# Supplementary material for: A new method for groundwater pollution investigation
Source: Research Square preprint supplement (doi:10.21203/rs.3.rs-3122682/v1), 2023-07-27
Supplement: Supplementary file 1 [file 1508b930adb993e0a6546da4.docx]

**Table 6.** Factor layer judgement matrix M1

| Indicator layer | Main lithological factors | Aquifer-related factors | Potential domestic and industrial pollution sources (1 km area) | Main pollution sources | Other impact factors |
| --- | --- | --- | --- | --- | --- |
| Main lithological factors | 1.0000 | 2.7180 | 0.3679 | 0.2865 | 2.7180 |
| Aquifer-related factors | 0.3679 | 1.0000 | 0.6064 | 0.1353 | 0.6064 |
| Potential domestic and industrial pollution sources (1 km area) | 2.7180 | 1.6490 | 1.0000 | 0.2865 | 1.6490 |
| Main pollution sources | 3.4900 | 7.3900 | 3.4900 | 1.0000 | 7.3900 |
| Other impact factors | 0.3679 | 1.6490 | 0.6064 | 0.1353 | 1.0000 |
