# Supplementary material for: A new method for groundwater pollution investigation
Source: Research Square preprint supplement (doi:10.21203/rs.3.rs-3122682/v1), 2023-07-27
Supplement: Supplementary file 2 [file 24f05c803ce3ca76cea4a91c.docx]

**Highlightst**

In this study, an improved AHP-entropy weighting method is proposed for groundwater contamination sampling and survey methods, and a weighting model is fitted using least squares to apply the model to groundwater contamination surveys.

Fisrt,Improvements to the AHP method,Based on the 1-9 scaling method, a scaling method that organically combines the exponential scaling method with the e0/4-e8/4 scaling method is proposed.

Secondly,Compared with other models, the model does not require early sampling data for sample point allocation. This reduces sampling effort and at the same time reduces sampling costs.

Finally,In the existing studies, there are no methods that combine weighting evaluation methods with groundwater pollution surveys, and in particular, there are relatively few studies on the optimization of the number of sampling points for groundwater pollution. therefore,The method provides a new approach for investigating underground pollution at small regional industrial plants, and it can reduce costs while ensuring the representativeness of sampling points.
