# Supplementary material for: A new method for groundwater pollution investigation
Source: Research Square preprint supplement (doi:10.21203/rs.3.rs-3122682/v1), 2023-07-27
Supplement: Supplementary file 3 [file 34d229274ebabe341f2a904e.docx]

**Table 10.** Comparison of the sampling point allocation results in units A-F

| Unit | Original plan | Weight allocation | New plan |
| --- | --- | --- | --- |
| A | 4 | 8 | 4 |
| B | 10 | 9 | 9 |
| **C** | 30 | 16 | 16 |
| D | 6 | 6 | 6 |
| E1 | 3 | 8 | 3 |
| E2 | 3 | 7 | 3 |
| F | 7 | 9 | 7 |
| Total | 63 | 63 | 48 |
