# Supplementary material for: A new method for groundwater pollution investigation
Source: Research Square preprint supplement (doi:10.21203/rs.3.rs-3122682/v1), 2023-07-27
Supplement: Supplementary file 4 [file 37af7f33affeb83a5fd41612.docx]

**Table 11.** Interpolation cross-validation results for different schemes

| Contaminate | ME | | RMSE | | MSE | |
| --- | --- | --- | --- | --- | --- | --- |
| Old plan | New plan | Old plan | New plan | Old plan | New plan |
| Cd | 0.017 | 0.036 | 1.693 | 1.808 | 0.008 | 0.012 |
| As | 0.017 | 0.021 | 1.046 | 1.071 | 0.010 | 0.015 |
| Hg | 0.048 | 0.031 | 1.027 | 0.985 | 0.038 | 0.019 |
| Pb | 0.040 | 0.026 | 1.111 | 1.172 | 0.034 | 0.021 |
| Volatile phenols | 0.064 | 0.103 | 1.470 | 1.538 | 0.038 | 0.058 |
| Vinyl chloride | 0.145 | 0.061 | 1.541 | 1.254 | 0.062 | 0.037 |
| Dichloromethane | 0.032 | 0.023 | 1.092 | 1.010 | 0.015 | 0.014 |
| Dichloroethylene | 0.018 | 0.008 | 1.182 | 1.286 | 0.017 | 0.013 |
| Benzene | 0.030 | 0.056 | 1.741 | 1.733 | 0.009 | 0.015 |
| Methyl benzene | 0.017 | 0.040 | 2.360 | 2.577 | 0.041 | 0.011 |
| Chlorobenzene | 0.036 | 0.031 | 2.154 | 2.313 | 0.016 | 0.012 |
| Ethyl benzene | 0.023 | 0.033 | 2.219 | 2.337 | 0.013 | 0.014 |
| Total dimethyl benzene | 0.005 | 0.001 | 1.984 | 2.103 | 0.001 | 0.001 |
| 1,4-dichlorobenzene | 0.007 | 0.014 | 1.817 | 1.875 | 0.006 | 0.010 |
| 1,2-dichlorobenzene | 0.032 | 0.032 | 1.953 | 1.953 | 0.020 | 0.020 |
