# Supplementary material for: A new method for groundwater pollution investigation
Source: Research Square preprint supplement (doi:10.21203/rs.3.rs-3122682/v1), 2023-07-27
Supplement: Supplementary file 5 [file 61e6e8a7fce40ecc248dc26a.docx]

**Table 1.** Two kinds of judgement matrix scales and their meanings

| Importance (ai vs. aj) | 1-9 scale | Exponential scale | e0/4-e8/4 scale |
| --- | --- | --- | --- |
| Same importance | 1 | 1 | 1 |
| Slightly more important | 3 | 1.316 | 1.649 |
| Significantly more important | 5 | 3 | 2.718 |
| Very significantly more important | 7 | 5.196 | 4.482 |
| Extremely more important | 9 | 9 | 7.390 |
| In the middle of these importance levels | 2, 4  6, 8 | 1.732, 2.279  3.948, 6.839 | 1.284, 2.117  3.490, 5.755 |
