# Supplementary material for: A new method for groundwater pollution investigation
Source: Research Square preprint supplement (doi:10.21203/rs.3.rs-3122682/v1), 2023-07-27
Supplement: Supplementary file 6 [file 80232d3fbf9cb0a89ad8eecb.docx]

**Table 5.** Factor layer judgement matrix A1

| Indicator layer | Main lithological factors | Aquifer-related factors | Potential domestic and industrial pollution sources (1 km area) | Main pollution sources | Other impact factors |
| --- | --- | --- | --- | --- | --- |
| Main lithological factors | 1.0000 | 4.1373 | 0.2417 | 0.1947 | 4.1373 |
| Aquifer-related factors | 0.2417 | 1.0000 | 0.2589 | 0.1014 | 0.4679 |
| Potential domestic and industrial pollution sources (1 km area) | 4.1373 | 3.8626 | 1.0000 | 0.1947 | 3.8626 |
| Main pollution sources | 5.1374 | 9.8627 | 5.1373 | 1.0000 | 9.8627 |
| Other impact factors | 0.2417 | 2.1373 | 0.2589 | 0.1014 | 1.0000 |
