# Supplementary material for: A new method for groundwater pollution investigation
Source: Research Square preprint supplement (doi:10.21203/rs.3.rs-3122682/v1), 2023-07-27
Supplement: Supplementary file 7 [file 80e27f45bc188e2d5472b137.docx]

**Table 12.** Interpolation cross-validation results for different schemes

| Contaminate | Variation range | | |
| --- | --- | --- | --- |
| ME | RMSE | MSE |
| Cd | 111.76% | 6.79% | 50.00% |
| As | 23.53% | 2.39% | 50.00% |
| Hg | 35.42% | 4.09% | 50.00% |
| Pb | 35.00% | 5.49% | 38.24% |
| Volatile phenols | 60.94% | 4.63% | 52.63% |
| Vinyl chloride | 57.93% | 18.62% | 40.32% |
| Dichloromethane | 28.13% | 7.51% | 6.67% |
| Dichloroethylene | 55.56% | 8.80% | 23.53% |
| Benzene | 86.67% | 0.46% | 66.67% |
| Methyl benzene | 135.29% | 9.19% | 73.17% |
| Chlorobenzene | 13.89% | 7.38% | 25.00% |
| Ethyl benzene | 43.48% | 5.32% | 7.69% |
| Total dimethyl benzene | 80.00% | 6.00% | 0.50% |
| 1,4-dichlorobenzene | 100.0% | 3.19% | 150.00% |
| 1,2-dichlorobenzene | 0.00% | 0.00% | 0.00% |
