# Supplementary material for: A new method for groundwater pollution investigation
Source: Research Square preprint supplement (doi:10.21203/rs.3.rs-3122682/v1), 2023-07-27
Supplement: Supplementary file 8 [file 8331c127311d9b50d6307fcb.docx]

**Table 3.** Sample allocation model for groundwater pollution investigation in a chemical plant area in Shenyang

| Target layer | Factor layer | Indicator layer | Unit layer |
| --- | --- | --- | --- |
| Assignment of weights for each module | Main lithological factors | Geological conditions | A  B  C  D  E1  E2  F |
| Permeability |
| Aquifer-related factors | Aquifer water level |
| Groundwater recharge and runoff |
| Groundwater extraction |
| Water level elevation |
| Main pollution sources | Sewage discharge pits |
| Chromium slag piles |
| Leakage from pigment drums, methanol storage tanks, hydrochloric acid storage tanks, and chloroform storage tanks |
| Industrial production, storage and treatment at plants |
| Construction waste and cinder piles |
| Organic pesticides |
| Potential domestic and industrial pollution sources (1Km area) | Industrial |
| Residential |
| Other influential factors | Area |
| Population |
