# Supplementary material for: A new method for groundwater pollution investigation
Source: Research Square preprint supplement (doi:10.21203/rs.3.rs-3122682/v1), 2023-07-27
Supplement: Supplementary file 9 [file 853e6d800b3b28ee0a0163ac.docx]

**Table 7.** Assigned weights for cell layers A-F based on the improved AHP

| Unit layer | W1 | W2 | W |
| --- | --- | --- | --- |
| A | 0.1417 | 0.1393 | 0.1405 |
| B | 0.1474 | 0.1539 | 0.1507 |
| **C** | 0.2899 | 0.2354 | 0.2627 |
| D | 0.0943 | 0.111 | 0.1027 |
| E1 | 0.0938 | 0.1121 | 0.1030 |
| E2 | 0.0851 | 0.106 | 0.0956 |
| F | 0.1478 | 0.1423 | 0.1451 |
