# Supplementary material for: A new method for groundwater pollution investigation
Source: Research Square preprint supplement (doi:10.21203/rs.3.rs-3122682/v1), 2023-07-27
Supplement: Supplementary file 10 [file 987c7b112b010c70a2104051.docx]

**Table 4.** Basic information for the chemical investigation area in Shenyang

| Survey partition | A | B | C | D | E1 | E2 | F |
| --- | --- | --- | --- | --- | --- | --- | --- |
| Geological conditions (class) | 5 | 5 | 5 | 2 | 2 | 2 | 3 |
| Permeability | 2 | 5 | 3 | 1 | 1 | 1 | 2 |
| Aquifer water level (m) | 12.5 | 10 | 10.5 | 7.5 | 7 | 7 | 13.5 |
| Groundwater runoff (place) | 2 | 1 | 5 | 2 | 2 | 3 | 3 |
| Groundwater recharge (place) | 4 | 8 | 34 | 6 | 2 | 1 | 5 |
| Water table elevation (m) | 43.25 | 44.77 | 43.76 | 44.86 | 45.07 | 43.06 | 42.74 |
| Area (m2) | 24614 | 24861 | 211351 | 30930 | 10215 | 5567 | 41877 |
