# Supplementary material for: A new method for groundwater pollution investigation
Source: Research Square preprint supplement (doi:10.21203/rs.3.rs-3122682/v1), 2023-07-27
Supplement: Supplementary file 11 [file ad17af7845d42bc70d32e8d9.docx]

**Table 9.** Results of regional weight allocation for groundwater pollution investigation in a chemical industry with units A-F in Shenyang

| Unit | Subjective weight | Objective weight | Combined weight |
| --- | --- | --- | --- |
| A | 0.1405 | 0.1392 | 0.1399 |
| B | 0.1507 | 0.1459 | 0.1483 |
| **C** | 0.2627 | 0.1671 | 0.2148 |
| D | 0.1027 | 0.1325 | 0.1176 |
| E1 | 0.1030 | 0.1404 | 0.1217 |
| E2 | 0.0956 | 0.1333 | 0.1144 |
| F | 0.1451 | 0.1415 | 0.1433 |
