# Supplementary material for: A new method for groundwater pollution investigation
Source: Research Square preprint supplement (doi:10.21203/rs.3.rs-3122682/v1), 2023-07-27
Supplement: Supplementary file 12 [file bdf25bcad2bb257ecad94f3f.docx]

**Table 8.** Objective entropy and weight values of for pollution units A-F in Shenyang

| Unit layer |  |  |
| --- | --- | --- |
| A | 2.2120 | 0.1392 |
| B | 2.2701 | 0.1459 |
| **C** | 2.4549 | 0.1671 |
| D | 2.1538 | 0.1325 |
| E1 | 2.2223 | 0.1404 |
| E2 | 2.1602 | 0.1333 |
| F | 2.2321 | 0.1415 |
